# Supplementary material for: Comorbidity burden of patients with Parkinson’s disease and Parkinsonism between 2003 and 2012: A multicentre, nationwide, retrospective study in China
Source: PubMed Central journal article supplement (PMC5431825; doi:10.1038/s41598-017-01795-0), 2017-05-10
Supplement: 41598_2017_1795_MOESM1_ESM.pdf [file 41598_2017_1795_MOESM1_ESM.pdf]

**Comorbidity burden of patients with Parkinson's disease and Parkinsonism between 2003 and 2012: A multicentre, nationwide, retrospective study in China**

Xin Wang<sup>1,+</sup>, Fan Zeng<sup>1,+</sup>, Wang-Sheng Jin<sup>1,+</sup>, Chi Zhu<sup>1</sup>, Qing-Hua Wang<sup>1</sup>, Xian-Le Bu<sup>1</sup>, Hong-Bo Luo<sup>2</sup>, Hai-Qiang Zou<sup>3</sup>, Jie Pu<sup>4</sup>, Zhong-He Zhou<sup>5</sup>, Xiao-Ping Cui<sup>6</sup>, Qing-Song Wang<sup>7</sup>, Xiang-Qun Shi<sup>2</sup>, Wei Han<sup>8</sup>, Qiang Wu<sup>4</sup>, Hui-Sheng Chen<sup>5</sup>, Hang Lin<sup>6</sup>, Li-Li Zhang<sup>1</sup>, Meng Zhang<sup>1</sup>, Yan Lian<sup>1,9</sup>, Zhi-Qiang Xu<sup>1</sup>, Hua-Dong Zhou<sup>1</sup>, Tao Zhang<sup>1,\*</sup>, Yan-Jiang Wang<sup>1</sup>

## Supplementary Information

### Supplementary Figure S1.

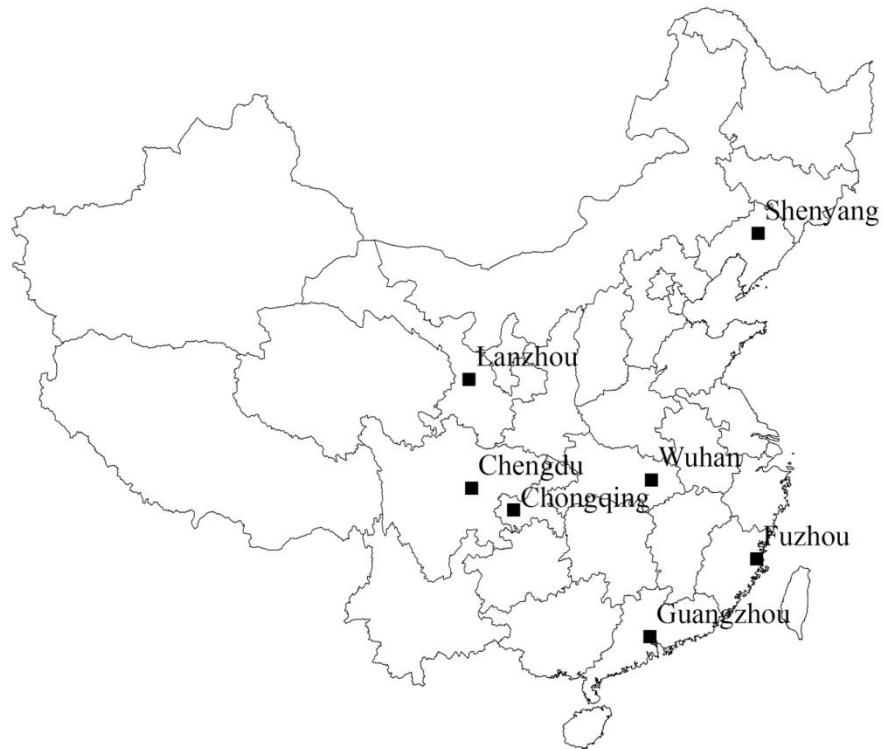

**Supplementary Figure S1. Location of the seven cities selected in the study.** The selected cities were Chongqing (southwest China), Chengdu (southwest China), Guangzhou (southeast China), Fuzhou (southeast China), Lanzhou (northwest China), Nanjing (east China), Wuhan (central China) and Shenyang (northeast China). This map was created using the ArcGIS10.0 software (Environmental Systems Research Institute, Inc).

**Supplementary Table S1. The prevalence of concomitant disease included in ECI and CCI for all patients, PD patients, Parkinsonism patients**

|                                        | Overall     | PD          | Parkinsonism | <i>P</i> value <sup>a</sup> |
|----------------------------------------|-------------|-------------|--------------|-----------------------------|
| ECI                                    | 1.0(1.2)    | 1.0(1.2)    | 1.1(1.2)     |                             |
| CCI                                    | 1.1(1.5)    | 1.1(1.5)    | 1.3(1.6)     |                             |
| Myocardial infarction                  | 43(1.03)    | 35(1.04)    | 8(0.97)      | 0.86                        |
| Congestive heart failure               | 113(2.70)   | 91(2.70)    | 22(2.67)     | 0.96                        |
| Peripheral vascular disease            | 93(2.22)    | 69(2.05)    | 24(2.92)     | 0.13                        |
| Cerebrovascular disease                | 1870(44.63) | 1432(42.53) | 438(53.22)   | <0.001                      |
| Diabetes without chronic complication  | 453(10.81)  | 357(10.60)  | 96(11.66)    | 0.38                        |
| Chronic pulmonary disease              | 286(6.83)   | 235(6.98)   | 51(6.20)     | 0.43                        |
| Rheumatoid arthritis/collagen vascular | 37(0.88)    | 31(0.92)    | 6(0.73)      | 0.60                        |

diseases

|                                       |           |           |           |        |
|---------------------------------------|-----------|-----------|-----------|--------|
| Peptic ulcer disease without bleeding | 33(0.79)  | 27(0.80)  | 6(0.73)   | 0.83   |
| Mild liver disease                    | 192(4.58) | 169(5.02) | 23(2.79)  | 0.0062 |
| Dementia                              | 206(4.92) | 148(4.40) | 58(7.05)  | 0.0016 |
| Paralysis                             | 277(6.61) | 186(5.52) | 91(11.06) | <0.001 |
| Renal failure                         | 72(1.72)  | 54(1.60)  | 18(2.19)  | 0.25   |
| Diabetes with chronic complication    | 63(1.50)  | 47(1.40)  | 16(1.94)  | 0.25   |
| Solid tumor without metastasis        | 142(3.39) | 126(3.74) | 16(1.94)  | 0.011  |
| Lymphoma                              | 2(0.05)   | 2(0.06)   | 0(0.00)   | 1.00   |
| Moderate or severe liver disease      | 15(0.36)  | 14(0.42)  | 1(0.12)   | 0.33   |
| Metastatic cancer                     | 44(1.05)  | 36(1.07)  | 8(0.97)   | 0.81   |
| AIDS/HIV                              | 1(0.02)   | 1(0.03)   | 0(0.00)   | 1.00   |
| Cardiac arrhythmias                   | 196(4.68) | 153(4.54) | 43(5.22)  | 0.41   |

|                                 |             |             |            |        |
|---------------------------------|-------------|-------------|------------|--------|
| Valvular disease                | 26(0.62)    | 22(0.65)    | 4(0.49)    | 0.58   |
| Pulmonary circulation disorders | 65(1.55)    | 49(1.46)    | 16(1.94)   | 0.31   |
| Hypertension                    | 1438(34.32) | 1117(33.17) | 321(39.00) | 0.0016 |
| Other neurological disorders    | 226(5.39)   | 177(5.26)   | 49(5.95)   | 0.43   |
| Hypothyroidism                  | 13(0.31)    | 12(0.36)    | 1(0.12)    | 0.48   |
| Coagulopathy                    | 5(0.12)     | 4(0.12)     | 1(0.12)    | 1.00   |
| Obesity                         | 6(0.14)     | 4(0.12)     | 2(0.24)    | 0.34   |
| Weight loss                     | 24(0.57)    | 15(0.45)    | 9(1.09)    | 0.037  |
| Fluid and electrolyte disorders | 91(2.17)    | 73(2.17)    | 18(2.19)   | 0.97   |
| Blood loss anaemia              | 9(0.21)     | 7(0.21)     | 2(0.24)    | 0.69   |
| Deficiency anaemia              | 84(2.00)    | 65(1.93)    | 19(2.31)   | 0.49   |
| Alcohol abuse                   | 10(0.24)    | 6(0.18)     | 4(0.49)    | 0.11   |
| Drug abuse                      | 18(0.43)    | 11(0.33)    | 7(0.85)    | 0.066  |

|            |            |           |          |      |
|------------|------------|-----------|----------|------|
| Depression | 52(1.24)   | 44(1.31)  | 8(0.97)  | 0.44 |
| Psychoses  | 139 (3.32) | 110(3.27) | 29(3.52) | 0.71 |

---

<sup>a</sup> *P* values of chi-square test between PD and Parkinsonism group.

**Supplementary Table S2. The age-specific prevalence of concomitant disease included in ECI and CCI for all patients**

| Overall                                         | <50        | 50≤age<59  | 60≤age<69  | 70≤age<79  | ≥80        |
|-------------------------------------------------|------------|------------|------------|------------|------------|
| ECI                                             | 0.29(0.58) | 0.50(0.80) | 0.78(0.94) | 1.18(1.24) | 1.79(1.51) |
| CCI                                             | 0.22(0.68) | 0.56(0.96) | 0.85(1.09) | 1.33(1.48) | 2.11(1.99) |
| Myocardial infarction                           | 0(0.00)    | 0(0.00)    | 2(0.18)    | 17(1.15)   | 24(3.56)   |
| Congestive heart failure                        | 1(0.36)    | 1(0.16)    | 7(0.62)    | 46(3.12)   | 58(8.59)   |
| Peripheral vascular disease                     | 1(0.36)    | 3(0.48)    | 27(2.39)   | 43(2.91)   | 19(2.81)   |
| Cerebrovascular disease                         | 27(9.68)   | 182(28.98) | 468(41.34) | 784(53.12) | 409(60.59) |
| Diabetes without chronic complication           | 4(1.43)    | 40(6.37)   | 98(8.66)   | 209(14.16) | 102(15.11) |
| Chronic pulmonary disease                       | 3(1.08)    | 5(0.80)    | 36(3.18)   | 121(8.20)  | 121(17.93) |
| Rheumatoid arthritis/collagen vascular diseases | 1(0.36)    | 2(0.32)    | 17(1.50)   | 13(0.88)   | 4(0.59)    |

|                                       |         |          |          |           |            |
|---------------------------------------|---------|----------|----------|-----------|------------|
| Peptic ulcer disease without bleeding | 1(0.36) | 2(0.32)  | 3(0.27)  | 11(0.75)  | 16(2.37)   |
| Mild liver disease                    | 7(2.51) | 22(3.50) | 53(4.68) | 75(5.08)  | 35(5.19)   |
| Dementia                              | 1(0.36) | 6(0.96)  | 16(1.41) | 75(5.08)  | 108(16.00) |
| Paralysis                             | 2(0.72) | 12(1.91) | 40(3.53) | 117(7.93) | 106(15.70) |
| Renal failure                         | 1(0.36) | 4(0.64)  | 7(0.62)  | 19(1.29)  | 41(6.07)   |
| Diabetes with chronic complication    | 0(0.00) | 4(0.64)  | 12(1.06) | 29(1.96)  | 18(2.67)   |
| Solid tumor without metastasis        | 1(0.36) | 13(2.07) | 26(2.30) | 54(3.66)  | 48(7.11)   |
| Lymphoma                              | 0(0.00) | 0(0.00)  | 0(0.00)  | 2(0.14)   | 0(0.00)    |
| Moderate or severe liver disease      | 0(0.00) | 3(0.48)  | 3(0.27)  | 4(0.27)   | 5(0.74)    |
| Metastatic cancer                     | 1(0.36) | 2(0.32)  | 8(0.71)  | 19(1.29)  | 14(2.07)   |
| AIDS/HIV                              | 0(0.00) | 0(0.00)  | 1(0.09)  | 0(0.00)   | 0(0.00)    |
| Cardiac arrhythmias                   | 1(0.36) | 7(1.11)  | 26(2.30) | 81(5.49)  | 81(12.00)  |
| Valvular disease                      | 1(0.36) | 1(0.16)  | 8(0.71)  | 7(0.47)   | 9(1.33)    |



|                                 |          |            |            |            |            |
|---------------------------------|----------|------------|------------|------------|------------|
| Pulmonary circulation disorders | 0(0.00)  | 1(0.16)    | 13(1.15)   | 30(2.03)   | 21(3.11)   |
| Hypertension                    | 13(4.66) | 110(17.52) | 327(28.89) | 626(42.41) | 362(53.63) |
| Other neurological disorders    | 15(5.38) | 24(3.82)   | 70(6.18)   | 88(5.96)   | 29(4.30)   |
| Hypothyroidism                  | 1(0.36)  | 1(0.16)    | 3(0.27)    | 3(0.20)    | 5(0.74)    |
| Coagulopathy                    | 0(0.00)  | 0(0.00)    | 1(0.09)    | 1(0.07)    | 3(0.44)    |
| Obesity                         | 0(0.00)  | 0(0.00)    | 1(0.09)    | 3(0.20)    | 2(0.30)    |
| Weight loss                     | 0(0.00)  | 2(0.32)    | 4(0.35)    | 10(0.68)   | 8(1.19)    |
| Fluid and electrolyte disorders | 3(1.08)  | 4(0.64)    | 12(1.06)   | 35(2.37)   | 37(5.48)   |
| Blood loss anaemia              | 0(0.00)  | 1(0.16)    | 1(0.09)    | 4(0.27)    | 3(0.44)    |
| Deficiency anaemia              | 3(1.08)  | 6(0.96)    | 6(0.53)    | 39(2.64)   | 30(4.44)   |
| Alcohol abuse                   | 1(0.36)  | 4(0.64)    | 2(0.18)    | 2(0.14)    | 1(0.15)    |
| Drug abuse                      | 0(0.00)  | 5(0.80)    | 8(0.71)    | 3(0.20)    | 2(0.30)    |
| Depression                      | 4(1.43)  | 7(1.11)    | 20(1.77)   | 12(0.81)   | 9(1.33)    |

|           |          |          |          |          |          |
|-----------|----------|----------|----------|----------|----------|
| Psychoses | 15(5.38) | 27(4.30) | 41(3.62) | 39(2.64) | 17(2.52) |
|-----------|----------|----------|----------|----------|----------|

---

**Supplementary Table S3. The age-specific prevalence of comorbidities included in ECI and CCI for PD patients**

| PD                                              | <50        | 50≤age<59  | 60≤age<69  | 70≤age<79  | ≥80        |
|-------------------------------------------------|------------|------------|------------|------------|------------|
| ECI                                             | 0.29(0.59) | 0.46(0.76) | 0.77(0.94) | 1.17(1.22) | 1.81(1.53) |
| CCI                                             | 0.19(0.56) | 0.54(0.92) | 0.84(1.11) | 1.29(1.44) | 2.11(2.02) |
| Myocardial infarction                           | 0(0.00)    | 0(0.00)    | 2(0.22)    | 13(1.13)   | 20(3.88)   |
| Congestive heart failure                        | 1(0.43)    | 1(0.19)    | 7(0.75)    | 35(3.04)   | 47(9.13)   |
| Peripheral vascular disease                     | 0(0.00)    | 1(0.19)    | 20(2.15)   | 33(2.86)   | 15(2.91)   |
| Cerebrovascular disease                         | 19(8.12)   | 155(28.92) | 365(39.29) | 594(51.52) | 299(58.06) |
| Diabetes without chronic complication           | 3(1.28)    | 30(5.60)   | 83(8.93)   | 162(14.05) | 79(15.34)  |
| Chronic pulmonary disease                       | 3(1.28)    | 4(0.75)    | 32(3.44)   | 101(8.76)  | 95(18.45)  |
| Rheumatoid arthritis/collagen vascular diseases | 1(0.43)    | 2(0.37)    | 14(1.51)   | 10(0.87)   | 4(0.78)    |

|                                       |         |          |          |          |           |
|---------------------------------------|---------|----------|----------|----------|-----------|
| Peptic ulcer disease without bleeding | 1(0.43) | 2(0.37)  | 3(0.32)  | 9(0.78)  | 12(2.33)  |
| Mild liver disease                    | 7(2.99) | 21(3.92) | 49(5.27) | 63(5.46) | 30(5.83)  |
| Dementia                              | 1(0.43) | 3(0.56)  | 12(1.29) | 49(4.25) | 83(16.12) |
| Paralysis                             | 2(0.85) | 8(1.49)  | 26(2.80) | 77(6.68) | 73(14.17) |
| Renal failure                         | 1(0.43) | 4(0.75)  | 5(0.54)  | 16(1.39) | 28(5.44)  |
| Diabetes with chronic complication    | 0(0.00) | 4(0.75)  | 10(1.08) | 19(1.65) | 14(2.72)  |
| Solid tumor without metastasis        | 1(0.43) | 13(2.43) | 24(2.58) | 46(3.99) | 42(8.16)  |
| Lymphoma                              | 0(0.00) | 0(0.00)  | 0(0.00)  | 2(0.17)  | 0(0.00)   |
| Moderate or severe liver disease      | 0(0.00) | 3(0.56)  | 2(0.22)  | 4(0.35)  | 5(0.97)   |
| Metastatic cancer                     | 0(0.00) | 1(0.19)  | 8(0.86)  | 15(1.30) | 12(2.33)  |
| AIDS/HIV                              | 0(0.00) | 0(0.00)  | 1(0.11)  | 0(0.00)  | 0(0.00)   |
| Cardiac arrhythmias                   | 0(0.00) | 5(0.93)  | 21(2.26) | 60(5.20) | 67(13.01) |
| Valvular disease                      | 1(0.43) | 1(0.19)  | 7(0.75)  | 5(0.43)  | 8(1.55)   |

|                                 |          |           |            |            |            |
|---------------------------------|----------|-----------|------------|------------|------------|
| Pulmonary circulation disorders | 0(0.00)  | 1(0.19)   | 12(1.29)   | 22(1.91)   | 14(2.72)   |
| Hypertension                    | 12(5.13) | 92(17.16) | 258(27.77) | 485(42.06) | 270(52.43) |
| Other neurological disorders    | 11(4.70) | 18(3.36)  | 57(6.14)   | 73(6.33)   | 18(3.50)   |
| Hypothyroidism                  | 1(0.43)  | 0(0.00)   | 3(0.32)    | 3(0.26)    | 5(0.97)    |
| Coagulopathy                    | 0(0.00)  | 0(0.00)   | 1(0.11)    | 1(0.09)    | 2(0.39)    |
| Obesity                         | 0(0.00)  | 0(0.00)   | 0(0.00)    | 2(0.17)    | 2(0.39)    |
| Weight loss                     | 0(0.00)  | 1(0.19)   | 3(0.32)    | 6(0.52)    | 5(0.97)    |
| fluid and electrolyte disorders | 2(0.85)  | 4(0.75)   | 9(0.97)    | 26(2.25)   | 32(6.21)   |
| Blood loss anaemia              | 0(0.00)  | 1(0.19)   | 1(0.11)    | 2(0.17)    | 3(0.58)    |
| Deficiency anaemia              | 3(1.28)  | 5(0.93)   | 5(0.54)    | 26(2.25)   | 26(5.05)   |
| Alcohol abuse                   | 1(0.43)  | 2(0.37)   | 0(0.00)    | 2(0.17)    | 1(0.19)    |
| Drug abuse                      | 0(0.00)  | 1(0.19)   | 7(0.75)    | 2(0.17)    | 1(0.19)    |
| Depression                      | 3(1.28)  | 7(1.31)   | 16(1.72)   | 10(0.87)   | 8(1.55)    |

Psychoses

13(5.56)

17(3.17)

34(3.66)

34(2.95)

12(2.33)

---

**Supplementary Table S4. The age-specific prevalence of comorbidities included in ECI and CCI for Parkinsonism patients**

| Parkinsonism                                    | <50        | 50≤age<59  | 60≤age<69  | 70≤age<79  | ≥80        |
|-------------------------------------------------|------------|------------|------------|------------|------------|
| ECI                                             | 0.29(0.55) | 0.71(0.98) | 0.80(0.92) | 1.22(1.31) | 1.73(1.43) |
| CCI                                             | 0.36(1.11) | 0.64(1.17) | 0.90(1.00) | 1.46(1.61) | 2.10(1.89) |
| Myocardial infarction                           | 0(0.00)    | 0(0.00)    | 0(0.00)    | 4(1.24)    | 4(2.50)    |
| Congestive heart failure                        | 0(0.00)    | 0(0.00)    | 0(0.00)    | 11(3.41)   | 11(6.88)   |
| Peripheral vascular disease                     | 1(2.22)    | 2(2.17)    | 7(3.45)    | 10(3.10)   | 4(2.50)    |
| Cerebrovascular disease                         | 8(17.78)   | 27(29.35)  | 103(50.74) | 190(58.82) | 110(68.75) |
| Diabetes without chronic complication           | 1(2.22)    | 10(10.87)  | 15(7.39)   | 47(14.55)  | 23(14.38)  |
| Chronic pulmonary disease                       | 0(0.00)    | 1(1.09)    | 4(1.97)    | 20(6.19)   | 26(16.25)  |
| Rheumatoid arthritis/collagen vascular diseases | 0(0.00)    | 0(0.00)    | 3(1.48)    | 3(0.93)    | 0(0.00)    |
| Peptic ulcer disease without bleeding           | 0(0.00)    | 0(0.00)    | 0(0.00)    | 2(0.62)    | 4(2.50)    |
| Mild liver disease                              | 0(0.00)    | 2(2.17)    | 4(1.97)    | 12(3.72)   | 5(3.13)    |

|                                    |         |           |           |            |           |
|------------------------------------|---------|-----------|-----------|------------|-----------|
| Dementia                           | 0(0.00) | 3(3.26)   | 4(1.97)   | 26(8.05)   | 25(15.63) |
| Paralysis                          | 0(0.00) | 4(4.35)   | 14(6.90)  | 40(12.38)  | 33(20.63) |
| Renal failure                      | 0(0.00) | 0(0.00)   | 2(0.99)   | 3(0.93)    | 13(8.13)  |
| Diabetes with chronic complication | 0(0.00) | 0(0.00)   | 2(0.99)   | 10(3.10)   | 4(2.50)   |
| Solid tumor without metastasis     | 0(0.00) | 0(0.00)   | 2(0.99)   | 8(2.48)    | 6(3.75)   |
| Lymphoma                           | 0(0.00) | 0(0.00)   | 0(0.00)   | 0(0.00)    | 0(0.00)   |
| Moderate or severe liver disease   | 0(0.00) | 0(0.00)   | 1(0.49)   | 0(0.00)    | 0(0.00)   |
| Metastatic cancer                  | 1(2.22) | 1(1.09)   | 0(0.00)   | 4(1.24)    | 2(1.25)   |
| AIDS/HIV                           | 0(0.00) | 0(0.00)   | 0(0.00)   | 0(0.00)    | 0(0.00)   |
| Cardiac arrhythmias                | 1(2.22) | 2(2.17)   | 5(2.46)   | 21(6.50)   | 14(8.75)  |
| Valvular disease                   | 0(0.00) | 0(0.00)   | 1(0.49)   | 2(0.62)    | 1(0.63)   |
| Pulmonary circulation disorders    | 0(0.00) | 0(0.00)   | 1(0.49)   | 8(2.48)    | 7(4.38)   |
| Hypertension                       | 1(2.22) | 18(19.57) | 69(33.99) | 141(43.65) | 92(57.50) |



|                                 |         |           |          |          |          |
|---------------------------------|---------|-----------|----------|----------|----------|
| Other neurological disorders    | 4(8.89) | 6(6.52)   | 13(6.40) | 15(4.64) | 11(6.88) |
| Hypothyroidism                  | 0(0.00) | 1(1.09)   | 0(0.00)  | 0(0.00)  | 0(0.00)  |
| Coagulopathy                    | 0(0.00) | 0(0.00)   | 0(0.00)  | 0(0.00)  | 1(0.63)  |
| Obesity                         | 0(0.00) | 0(0.00)   | 1(0.49)  | 1(0.31)  | 0(0.00)  |
| Weight loss                     | 0(0.00) | 1(1.09)   | 1(0.49)  | 4(1.24)  | 3(1.88)  |
| Fluid and electrolyte disorders | 1(2.22) | 0(0.00)   | 3(1.48)  | 9(2.79)  | 5(3.13)  |
| Blood loss anaemia              | 0(0.00) | 0(0.00)   | 0(0.00)  | 2(0.62)  | 0(0.00)  |
| Deficiency anaemia              | 0(0.00) | 1(1.09)   | 1(0.49)  | 13(4.02) | 4(2.50)  |
| Alcohol abuse                   | 0(0.00) | 2(2.17)   | 2(0.99)  | 0(0.00)  | 0(0.00)  |
| Drug abuse                      | 0(0.00) | 4(4.35)   | 1(0.49)  | 1(0.31)  | 1(0.63)  |
| Depression                      | 1(2.22) | 0(0.00)   | 4(1.97)  | 2(0.62)  | 1(0.63)  |
| Psychoses                       | 2(4.44) | 10(10.87) | 7(3.45)  | 5(1.55)  | 5(3.13)  |

---

**Supplementary Table S5. Length of stay and hospitalization expense for PD patients**

| PD        | Length of Stay(day) |                         | Cost per Day <sup>a</sup> |                        |
|-----------|---------------------|-------------------------|---------------------------|------------------------|
|           | Mean(SD)            | <i>P</i> value          | Mean(SD)                  | <i>P</i> value         |
| Sex       |                     | Z=-4.135 <0.001         |                           | Z=-3.818 <0.001        |
| Male      | 17.0(16.8)          |                         | 1.09(1.04)                |                        |
| Female    | 13.7(12.7)          |                         | 0.94(0.69)                |                        |
| Age       |                     | $\chi^2=134.786$ <0.001 |                           | $\chi^2=19.159$ =0.001 |
| <50       | 11.1(10.7)          |                         | 0.78(0.43)                |                        |
| 50-59     | 10.3(6.3)           |                         | 0.97(0.71)                |                        |
| 60-69     | 13.9(15.6)          |                         | 1.01(1.24)                |                        |
| 70-79     | 16.5(14.4)          |                         | 1.07(0.77)                |                        |
| $\geq 80$ | 23.9(20.5)          |                         | 1.12(0.90)                |                        |

|     |            |                   |        |            |                 |        |
|-----|------------|-------------------|--------|------------|-----------------|--------|
| ECI |            | $\chi^2=89.447$   | <0.001 |            | $\chi^2=45.851$ | <0.001 |
| 0   | 13.0(16.5) |                   |        | 0.91(1.10) |                 |        |
| 1   | 16.3(15.6) |                   |        | 1.03(0.77) |                 |        |
| 2   | 16.1(13.1) |                   |        | 1.12(0.87) |                 |        |
| 3   | 20.1(15.2) |                   |        | 1.13(1.00) |                 |        |
| 4   | 19.2(13.7) |                   |        | 1.35(0.78) |                 |        |
| 5+  | 26.7(12.7) |                   |        | 1.21(0.62) |                 |        |
| CCI |            | $\chi^2= 101.833$ | <0.001 |            | $\chi^2=53.992$ | <0.001 |
| 0   | 13.8(15.8) |                   |        | 0.88(0.67) |                 |        |
| 1   | 14.4(14.7) |                   |        | 1.00(1.04) |                 |        |
| 2   | 16.1(13.0) |                   |        | 1.14(0.75) |                 |        |
| 3   | 19.9(15.3) |                   |        | 1.32(1.00) |                 |        |
| 4   | 26.1(23.4) |                   |        | 1.32(1.71) |                 |        |

5+

25.4(13.2)

1.12(0.62)

---

<sup>a</sup> Each value is divided by 1057 for standardization.

**Supplementary Table S6. Length of stay and hospitalization expense for Parkinsonism patients**

| PD     | Length of Stay(day) |                          | Cost per Day <sup>a</sup> |                           |
|--------|---------------------|--------------------------|---------------------------|---------------------------|
|        | Mean(SD)            | <i>P</i> value           | Mean(SD)                  | <i>P</i> value            |
| Sex    |                     | Z=-0.786<br>=0.432       |                           | Z=-1.595<br>=0.111        |
| Male   | 14.9(11.2)          |                          | 1.20(0.81)                |                           |
| Female | 13.5(10.2)          |                          | 1.10(1.09)                |                           |
| Age    |                     | $\chi^2=6.567$<br>=0.161 |                           | $\chi^2=14.151$<br>=0.007 |
| <50    | 18.1(14.5)          |                          | 0.84(0.48)                |                           |
| 50-59  | 14.4(9.0)           |                          | 0.73(0.36)                |                           |
| 60-69  | 11.0(4.9)           |                          | 1.12(1.18)                |                           |
| 70-79  | 14.5(11.7)          |                          | 1.27(0.83)                |                           |

|     |            |                  |        |            |                 |        |
|-----|------------|------------------|--------|------------|-----------------|--------|
| ≥80 | 19.1(14.3) |                  |        | 1.31(0.81) |                 |        |
| ECI |            | $\chi^2=8.395$   | =0.136 |            | $\chi^2=21.362$ | =0.001 |
| 0   | 13.4(12.1) |                  |        | 0.88(0.54) |                 |        |
| 1   | 13.5(10.3) |                  |        | 1.04(0.53) |                 |        |
| 2   | 17.6(10.8) |                  |        | 1.46(1.01) |                 |        |
| 3   | 13.0(7.6)  |                  |        | 1.98(2.12) |                 |        |
| 4   | 17.4(5.2)  |                  |        | 1.97(1.34) |                 |        |
| 5+  | 12.7(-)    |                  |        | 1.41(-)    |                 |        |
| CCI |            | $\chi^2= 13.829$ | =0.017 |            | $\chi^2=35.791$ | <0.001 |
| 0   | 16.8(14.6) |                  |        | 0.73(0.50) |                 |        |
| 1   | 11.5(6.7)  |                  |        | 1.04(0.58) |                 |        |
| 2   | 14.9(12.1) |                  |        | 1.67(1.31) |                 |        |
| 3   | 19.3(12.7) |                  |        | 1.32(1.19) |                 |        |

|    |           |            |
|----|-----------|------------|
| 4  | 11.2(3.6) | 1.43(0.61) |
| 5+ | 19.9(5.5) | 1.63(1.19) |

---

<sup>a</sup> Each value is divided by 1057 for standardization.

**Supplementary Table S7. The comorbidities profiles of different types of Parkinsonism**

|                          | Drug-induced secondary parkinsonism (n=9) | secondary parkinsonism due to other external agents (n=3) | postencephalitic parkinsonism (n=2) | vascular parkinsonism (n=330) | progressive supranuclear palsy (n=9) | multiple system atrophy (n=5) | other parkinsonism (n=115) | secondary parkinsonism, unspecified (n=350) |
|--------------------------|-------------------------------------------|-----------------------------------------------------------|-------------------------------------|-------------------------------|--------------------------------------|-------------------------------|----------------------------|---------------------------------------------|
| Myocardial infarction    | 0 (0.0)                                   | 0 (0.0)                                                   | 0 (0.0)                             | 6 (1.8)                       | 0 (0.0)                              | 0 (0.0)                       | 0 (0.0)                    | 2 (0.6)                                     |
| Congestive heart failure | 0 (0.0)                                   | 0 (0.0)                                                   | 0 (0.0)                             | 10 (3.0)                      | 0 (0.0)                              | 0 (0.0)                       | 4 (3.5)                    | 8 (2.3)                                     |
| Peripheral vascular      | 0 (0.0)                                   | 0 (0.0)                                                   | 0 (0.0)                             | 12 (3.6)                      | 0 (0.0)                              | 0 (0.0)                       | 6 (5.2)                    | 6 (1.7)                                     |



disease

|                 |          |         |           |            |          |         |           |           |
|-----------------|----------|---------|-----------|------------|----------|---------|-----------|-----------|
| Cerebrovascular | 1 (11.1) | 0 (0.0) | 2 (100.0) | 278 (84.2) | 7 (77.8) | 0 (0.0) | 60 (52.2) | 46 (13.1) |
|-----------------|----------|---------|-----------|------------|----------|---------|-----------|-----------|

disease

|                  |         |         |          |           |          |          |           |          |
|------------------|---------|---------|----------|-----------|----------|----------|-----------|----------|
| Diabetes without | 0 (0.0) | 0 (0.0) | 1 (50.0) | 56 (17.0) | 2 (22.2) | 1 (20.0) | 14 (12.2) | 23 (6.6) |
|------------------|---------|---------|----------|-----------|----------|----------|-----------|----------|

chronic complication

|                   |         |         |         |           |          |         |         |          |
|-------------------|---------|---------|---------|-----------|----------|---------|---------|----------|
| Chronic pulmonary | 0 (0.0) | 0 (0.0) | 0 (0.0) | 35 (10.6) | 1 (11.1) | 0 (0.0) | 4 (3.5) | 12 (3.4) |
|-------------------|---------|---------|---------|-----------|----------|---------|---------|----------|

disease

|            |         |         |         |         |         |         |         |         |
|------------|---------|---------|---------|---------|---------|---------|---------|---------|
| Rheumatoid | 0 (0.0) | 0 (0.0) | 0 (0.0) | 1 (0.3) | 0 (0.0) | 0 (0.0) | 0 (0.0) | 5 (1.4) |
|------------|---------|---------|---------|---------|---------|---------|---------|---------|

arthritis/collagen

vascular diseases

|                      |         |         |         |         |         |         |         |         |
|----------------------|---------|---------|---------|---------|---------|---------|---------|---------|
| Peptic ulcer disease | 0 (0.0) | 0 (0.0) | 0 (0.0) | 4 (1.2) | 0 (0.0) | 0 (0.0) | 1 (0.9) | 1 (0.3) |
|----------------------|---------|---------|---------|---------|---------|---------|---------|---------|

without bleeding

|                    |          |         |         |          |         |         |         |         |
|--------------------|----------|---------|---------|----------|---------|---------|---------|---------|
| Mild liver disease | 1 (11.1) | 0 (0.0) | 0 (0.0) | 11 (3.3) | 0 (0.0) | 0 (0.0) | 8 (7.0) | 3 (0.9) |
|--------------------|----------|---------|---------|----------|---------|---------|---------|---------|

|                                       |         |         |          |           |          |         |           |          |
|---------------------------------------|---------|---------|----------|-----------|----------|---------|-----------|----------|
| Dementia                              | 0 (0.0) | 0 (0.0) | 1 (50.0) | 29 (8.8)  | 0 (0.0)  | 0 (0.0) | 20 (17.4) | 5 (1.4)  |
| Paralysis                             | 0 (0.0) | 0 (0.0) | 0 (0.0)  | 70 (21.2) | 1 (11.1) | 0 (0.0) | 18 (15.7) | 3 (0.9)  |
| Renal failure                         | 0 (0.0) | 0 (0.0) | 0 (0.0)  | 10 (3.0)  | 0 (0.0)  | 0 (0.0) | 5 (4.3)   | 3 (0.9)  |
| Diabetes with chronic<br>complication | 0 (0.0) | 0 (0.0) | 0 (0.0)  | 11 (3.3)  | 0 (0.0)  | 0 (0.0) | 3 (2.6)   | 2 (0.6)  |
| Solid tumor without<br>metastasis     | 0 (0.0) | 0 (0.0) | 0 (0.0)  | 9 (2.7)   | 0 (0.0)  | 0 (0.0) | 1 (0.9)   | 6 (1.7)  |
| Lymphoma                              | 0 (0.0) | 0 (0.0) | 0 (0.0)  | 0 (0.0)   | 0 (0.0)  | 0 (0.0) | 0 (0.0)   | 0 (0.0)  |
| Moderate or severe<br>liver disease   | 0 (0.0) | 0 (0.0) | 0 (0.0)  | 1 (0.3)   | 0 (0.0)  | 0 (0.0) | 0 (0.0)   | 0 (0.0)  |
| Metastatic cancer                     | 0 (0.0) | 0 (0.0) | 0 (0.0)  | 4 (1.2)   | 0 (0.0)  | 0 (0.0) | 0 (0.0)   | 4 (1.1)  |
| AIDS/HIV                              | 0 (0.0) | 0 (0.0) | 0 (0.0)  | 0 (0.0)   | 0 (0.0)  | 0 (0.0) | 0 (0.0)   | 0 (0.0)  |
| Cardiac arrhythmias                   | 0 (0.0) | 0 (0.0) | 1 (50.0) | 17 (5.2)  | 1 (11.1) | 0 (0.0) | 11 (9.6)  | 13 (3.7) |

|                                 |          |          |           |            |          |          |           |           |
|---------------------------------|----------|----------|-----------|------------|----------|----------|-----------|-----------|
| Valvular disease                | 0 (0.0)  | 0 (0.0)  | 0 (0.0)   | 2 (0.6)    | 0 (0.0)  | 0 (0.0)  | 0 (0.0)   | 2 (0.6)   |
| Pulmonary circulation disorders | 0 (0.0)  | 0 (0.0)  | 0 (0.0)   | 9 (2.7)    | 0 (0.0)  | 0 (0.0)  | 3 (2.6)   | 4 (1.1)   |
| Hypertension                    | 0 (0.0)  | 0 (0.0)  | 1 (100.0) | 200 (60.6) | 3 (33.3) | 1 (20.0) | 50 (43.5) | 66 (18.9) |
| Other neurological disorders    | 1 (11.1) | 2 (66.7) | 0 (0.0)   | 17 (5.2)   | 2 (22.2) | 2 (40.0) | 14 (12.2) | 12 (3.4)  |
| Hypothyroidism                  | 1 (11.1) | 0 (0.0)  | 0 (0.0)   | 0 (0.0)    | 0 (0.0)  | 0 (0.0)  | 0 (0.0)   | 0 (0.0)   |
| Coagulopathy                    | 0 (0.0)  | 0 (0.0)  | 0 (0.0)   | 0 (0.0)    | 0 (0.0)  | 0 (0.0)  | 0 (0.0)   | 1 (0.3)   |
| Obesity                         | 0 (0.0)  | 0 (0.0)  | 0 (0.0)   | 2 (0.6)    | 0 (0.0)  | 0 (0.0)  | 0 (0.0)   | 0 (0.0)   |
| Weight loss                     | 0 (0.0)  | 0 (0.0)  | 0 (0.0)   | 4 (1.2)    | 0 (0.0)  | 0 (0.0)  | 2 (1.7)   | 3 (0.9)   |
| Fluid and electrolyte disorders | 0 (0.0)  | 0 (0.0)  | 0 (0.0)   | 9 (2.7)    | 0 (0.0)  | 0 (0.0)  | 2 (1.7)   | 7 (2.0)   |
| Blood loss anaemia              | 0 (0.0)  | 0 (0.0)  | 0 (0.0)   | 1 (0.3)    | 0 (0.0)  | 0 (0.0)  | 0 (0.0)   | 1 (0.3)   |

|                    |          |         |         |          |         |         |         |          |
|--------------------|----------|---------|---------|----------|---------|---------|---------|----------|
| Deficiency anaemia | 1 (11.1) | 0 (0.0) | 0 (0.0) | 3 (0.9)  | 0 (0.0) | 0 (0.0) | 1 (0.9) | 1 (0.3)  |
| Alcohol abuse      | 4 (44.4) | 0 (0.0) | 0 (0.0) | 0 (0.0)  | 0 (0.0) | 0 (0.0) | 0 (0.0) | 0 (0.0)  |
| Drug abuse         | 4 (44.4) | 0 (0.0) | 0 (0.0) | 1 (0.3)  | 0 (0.0) | 0 (0.0) | 1 (0.9) | 1 (0.3)  |
| Depression         | 0 (0.0)  | 0 (0.0) | 0 (0.0) | 3 (0.9)  | 0 (0.0) | 0 (0.0) | 1 (0.9) | 4 (1.1)  |
| Psychoses          | 4 (44.4) | 0 (0.0) | 0 (0.0) | 11 (3.3) | 0 (0.0) | 0 (0.0) | 3 (2.6) | 11 (3.1) |

---
